# Supplementary material for: An easily available lysosomal-targeted ratiometric fluorescent probe with aggregation induced emission characteristics for hydrogen polysulfide visualization in acute ulcerative colitis
Source: Royal Society of Chemistry journal article supplement (doi:10.1039/d1qm01043c), 2021-01-01
Supplement: d1qm01043c1.pdf [file d1qm01043c1.pdf]

## Supporting Information

### **An easily available lysosomal-targeted ratiometric fluorescent probe with aggregation induced emission characteristics for hydrogen polysulfides visualization in acute ulcerative colitis**

Chunbai Xiang†, <sup>a, b</sup> Chunbin Li†, <sup>c</sup> Jingjing Xiang†, <sup>a, b</sup> Yuan Luo, <sup>a</sup> Jiaofeng Peng, <sup>d</sup> Guanjun Deng, <sup>a</sup> Jianguo Wang, <sup>c</sup> Safacan Kolemen, <sup>e</sup> Hongchun Li, <sup>f</sup> Pengfei Zhang\*, <sup>a</sup> Ping Gong\*, <sup>a</sup> and Lintao Cai\* <sup>a</sup>

a. Guangdong Key Laboratory of Nanomedicine, CAS Key Laboratory of Health Informatics, Shenzhen Bioactive Materials Engineering Lab for Medicine, Institute of Biomedicine and Biotechnology, Shenzhen Institute of Advanced Technology, Chinese Academy of Sciences, Shenzhen 518055, China. \*E-mail: [pf.zhang@siat.ac.cn](mailto:pf.zhang@siat.ac.cn), [ping.gong@siat.ac.cn](mailto:ping.gong@siat.ac.cn) and [lt.cai@siat.ac.cn](mailto:lt.cai@siat.ac.cn)

b. University of Chinese Academy of Sciences, Beijing 100049, China.

c. College of Chemistry and Chemical Engineering, Inner Mongolia University, Hohhot 010021, P. R. China.

d. Instrumental Analysis Center of Shenzhen University, Shenzhen University, Shenzhen, 518055, P. R. China.

e. Koc University, Department of Chemistry, Rumelifeneri Yolu, Sariyer, Istanbul, 34450, Turkey.

f. Research Center for Computer-Aided Drug Discovery, Shenzhen Institute of Advanced Technology, Chinese Academy of Sciences, Shenzhen 518055, China.

† These authors contributed equally to this work.

\*Corresponding authors:

Prof. Lintao Cai ([lt.cai@siat.ac.cn](mailto:lt.cai@siat.ac.cn));

Prof. Ping Gong ([ping.gong@siat.ac.cn](mailto:ping.gong@siat.ac.cn));

Dr. Pengfei Zhang ([pf.zhang@siat.ac.cn](mailto:pf.zhang@siat.ac.cn)).

## Experiment section

### Chemicals and Materials

All reagents and chemicals were purchased from commercial source and used without further purification, GSSH was bought from Wuhan Biocar biomedical Co., Ltd. Solvents and other common reagents were obtained from Energy Chemical. Phosphate buffer saline (pH=7.4) was used to prepare all aqueous solutions. Solution of  $S_2O_5^{2-}$ ,  $ClO^-$ ,  $H_2O_2$ ,  $MnO_4^-$ ,  $Mg^{2+}$ ,  $K^+$ ,  $Fe^{3+}$ ,  $S^{2-}$ ,  $HSO_3^-$ ,  $SO_4^{2-}$ ,  $I^-$ ,  $S_2O_8^{2-}$ ,  $NO_3^-$  were prepared by dissolving their chlorides salts in HPLC grade DMSO. The stock solutions of various small biological molecules were prepared from analytically pure chemical reagents. Hydroxyl radical ( $\bullet OH$ ) was generated by reaction of  $50 \mu M Fe^{2+}$  with  $50 \mu M H_2O_2$ . Hydrogen peroxide ( $H_2O_2$ ) and hypochlorite ( $ClO^-$ ) were delivered from 30% and 5% aqueous solutions. BALB/C (4–6 weeks old and weighted 18–30 g) and C57BL/6J mice (7–8 weeks old and weighted 20–30 g) were purchased from Vital River Laboratory Animal Technology Co. Ltd (Beijing, China) and all animals received care in compliance with the guidelines outlined in the Guide for the Care and Use of Laboratory Animals. The procedures were approved by Shenzhen Institutes of Advanced Technology, Chinese Academy of Sciences Animal Care and Use Committee.

### Instruments

$^1H$  NMR and  $^{13}C$  NMR spectra were measured on a Bruker ARX 400 MHz spectrometer. High-resolution mass spectra (HRMS) were recorded on a GCT Premier CAB 048 mass spectrometer operating in MALDI-TOF mode. UV-vis absorption spectra were recorded on a Rarian 50 Conc UV-Visible spectrophotometer. Fluorescence emission spectra were recorded on Edinburgh FS5 fluorescence spectrophotometer. Cellular imaging experiments were performed with confocal laser scanning microscope (LSM 900 with Airyscan2, Zeiss, Germany). In vivo imaging of  $H_2S_n$  in live mice was performed on VISQUE® In Vivo Smart-LF imaging system. The quantum yield of TCFPB- $H_2S_n$  and TCFIS was evaluated with absolute PL Quantam Yielded Spectrometer C11347 (HAMAMATSU, Japan).

### The Synthesis of TCFIS

99.5mg of 2-(3-cyano-4,5,5-trimethyl-5H-furan-2-ylidene) malononitrile (compound 1, 0.5 mmol), 4-(diethylamino) salicylaldehyde (compound 2, 115.5 mg, 0.6 mmol) and piperidine (14 $\mu$ L, 0.3 mmol) was mixed in 10 mL ethanol, The reaction was refluxed overnight, cooled to room temperature, and purified by silica gel chromatography with the mixed solvent of PE/EA (5:1~1:1, v/v) to give TCFIS as a purple solid (159 mg, 85%).  $^1H$  NMR (400 MHz, DMSO- $d_6$ )  $\delta$  10.87 (s, 1H), 8.24 (s, 1H), 7.70 (d,  $J$  = 9.2 Hz, 1H), 6.94 (d,  $J$  = 15.2 Hz, 1H), 6.45 (dd,  $J$  = 9.3, 2.4 Hz, 1H), 6.15 (d,  $J$  = 2.4 Hz, 1H), 3.46 (q,  $J$  = 7.1 Hz, 4H), 1.70 (s, 6H), 1.16 (t,  $J$  = 7.0 Hz, 6H).  $^{13}C$  NMR (101 MHz, DMSO- $d_6$ )  $\delta$  177.97, 175.75, 162.69, 154.55, 114.55, 113.67, 113.30, 112.47, 107.25, 97.67, 96.93, 49.26, 45.04, 26.43, 13.14. HRMS (MALDI-TOF):  $m/z$ :  $[M+Na]$  calcd for  $C_{22}H_{22}N_4O_2Na$ : 397.16405; found: 397.16354.

### The Synthesis of TCFPB- $H_2S_n$

TCFIS (100 mg, 0.27 mmol), 2-fluoro-5-nitrobenzoic acid (93mg, 0.5mmol), and 4-dimethylaminopyridine (6 mg, 0.05 mmol) were dispersed in anhydrous  $CH_2Cl_2$ , and then 1-(3-(dimethylamino) propyl) -3- ethylcarbodiimide hydrochloride (67 mg, 0.35 mmol) was added. The reaction was stirred at room temperature for 12 h. The solvent was removed under reduced pressure, and the crude product was purified by with the mixed solvent of PE/EA (6:1~3:1, v/v)

to give TCFPB-H<sub>2</sub>S<sub>n</sub> as a purple solid (121mg, 83%). <sup>1</sup>H NMR (400 MHz, DMSO-d<sub>6</sub>) δ 8.87 (dd, J = 5.9, 2.9 Hz, 1H), 8.65 (dd, J = 8.0, 4.2 Hz, 1H), 8.15 – 8.07 (m, 2H), 7.77 (t, J = 9.5 Hz, 1H), 6.97 – 6.83 (m, 3H), 3.52 (q, J = 7.0 Hz, 4H), 1.67 (s, 6H), 1.17 (t, J = 7.0 Hz, 6H). <sup>13</sup>C NMR (101 MHz, DMSO-d<sub>6</sub>) δ 178.08, 175.71, 166.68, 164.00, 153.26, 153.19, 144.15, 141.90, 131.85, 131.65, 128.56, 119.98, 119.73, 114.21, 113.82, 112.89, 111.35, 109.87, 105.89, 98.86, 91.85, 51.84, 45.00, 25.51, 13.01. HRMS (MALDI-TOF): m/z: [M+Na] calcd for C<sub>29</sub>H<sub>24</sub>N<sub>5</sub>O<sub>5</sub>FNa: 564.16592; found: 564.16553.

### Photostability

To investigate the photostability of the probe system, the PL intensities of TCFPB-H<sub>2</sub>S<sub>n</sub> (*I*<sub>619 nm</sub>) in PBS solution were monitored by an Edinburgh FS5 fluorescence spectrophotometer, upon continuous irradiation with a 150 W Xe light (575 nm) of the fluorescence spectrophotometer, respectively. The photostability of TCFPB-H<sub>2</sub>S<sub>n</sub> was demonstrated by plotting *I*/*I*<sub>0</sub> versus the irradiation time, where *I* is the PL intensity of TCFPB-H<sub>2</sub>S<sub>n</sub> after the irradiation time of *t*, and *I*<sub>0</sub> is the PL intensity of TCFPB-H<sub>2</sub>S<sub>n</sub> before light irradiation.

### General procedures for the detection of H<sub>2</sub>S<sub>n</sub>

Unless otherwise noted, all the spectral measurements were performed in 5 mM phosphate buffer (pH 7.4, containing 0.5% DMSO) according to the following procedure. H<sub>2</sub>S<sub>n</sub> was prepared from Na<sub>2</sub>S<sub>4</sub> in aqueous solution. The stock solution (1.0 mM) of probe TCFPB-H<sub>2</sub>S<sub>n</sub> was first prepared in DMSO. 10 μL of TCFPB-H<sub>2</sub>S<sub>n</sub> stock solution was added to 2 mL PBS followed by addition of different volume of H<sub>2</sub>S<sub>n</sub> solution. The mixture was incubated at 37°C, and the reaction solution was transferred to a quartz cell with an optical length of 1 cm for measurement.

### Determination of the detection limit of TCFPB-H<sub>2</sub>S<sub>n</sub> toward addition of H<sub>2</sub>S<sub>n</sub>

Based on the linear fitting in Figure 2C, the detection limit (*C*) is estimated as follows:

$$C = 3\sigma/K$$

Where  $\sigma$  is the standard deviation obtained from three individual fluorescent intensity ratio (*I*<sub>619nm</sub>/*I*<sub>751nm</sub>) of TCFPB-H<sub>2</sub>S<sub>n</sub> (5 μM) without any H<sub>2</sub>S<sub>n</sub> and *K* is the slope obtained after linear fitting the titration curves in Figure 2C.

### Cell Culture

The HeLa cells were cultured in DMEM (containing 10% heat-inactivated FBS, 100 mg·mL<sup>-1</sup> penicillin and 100 mg·mL<sup>-1</sup> streptomycin) at 37 °C in a humidified incubator with 5% CO<sub>2</sub>. Before the experiments, the cells were precultured until confluence was reached.

### Fluorescence Imaging in the acute ulcerative colitis Mice

The 8week-old-female C57BL/6J mice were divided into two groups. The first group was a control group that was kept by drinking distilled water. The second group drank 3% DSS for 1 week. All mice were then injected with 100 μL of PBS containing 1 μM TCFPB-H<sub>2</sub>S<sub>n</sub>, and the images were obtained by a small animal optical in vivo imaging system. Histological analysis was performed on sacrificed mice after the in vivo imaging. The colon was immobilized in a 4% paraformaldehyde solution and embedded in paraffin wax. Colonic tissue was stained with eosin (H&E) and then examined under a light microscope.

### Computational Methods Details

We used GaussView 5.0<sup>1</sup> and Gaussian 09<sup>2</sup> software for structural visualization and simulation respectively. The structure of the compound is optimized to obtain the minimum energy form. The B3LYP function of DFT is implemented in the current research. For orbitals description, Pople basis set' 6-31G(d) is used for carbon, hydrogen, nitrogen, fluorine and oxygen atoms. Generate the highest occupied molecular orbitals (HOMOs) and lowest unoccupied molecular orbitals (LUMOs) to understand the electron density distribution of all compounds.

### Figures and tables

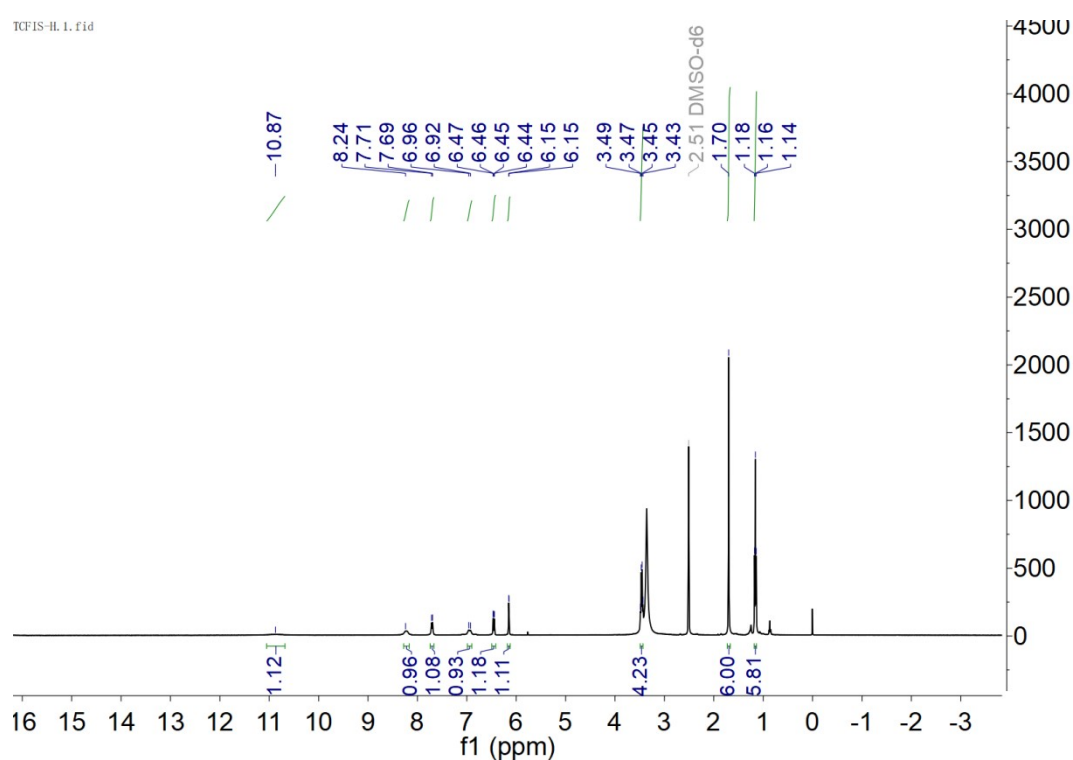

Figure S1. <sup>1</sup>H NMR spectrum of TCFIS in *d*<sub>6</sub>-DMSO.

TCFIS-H-C.3.fid

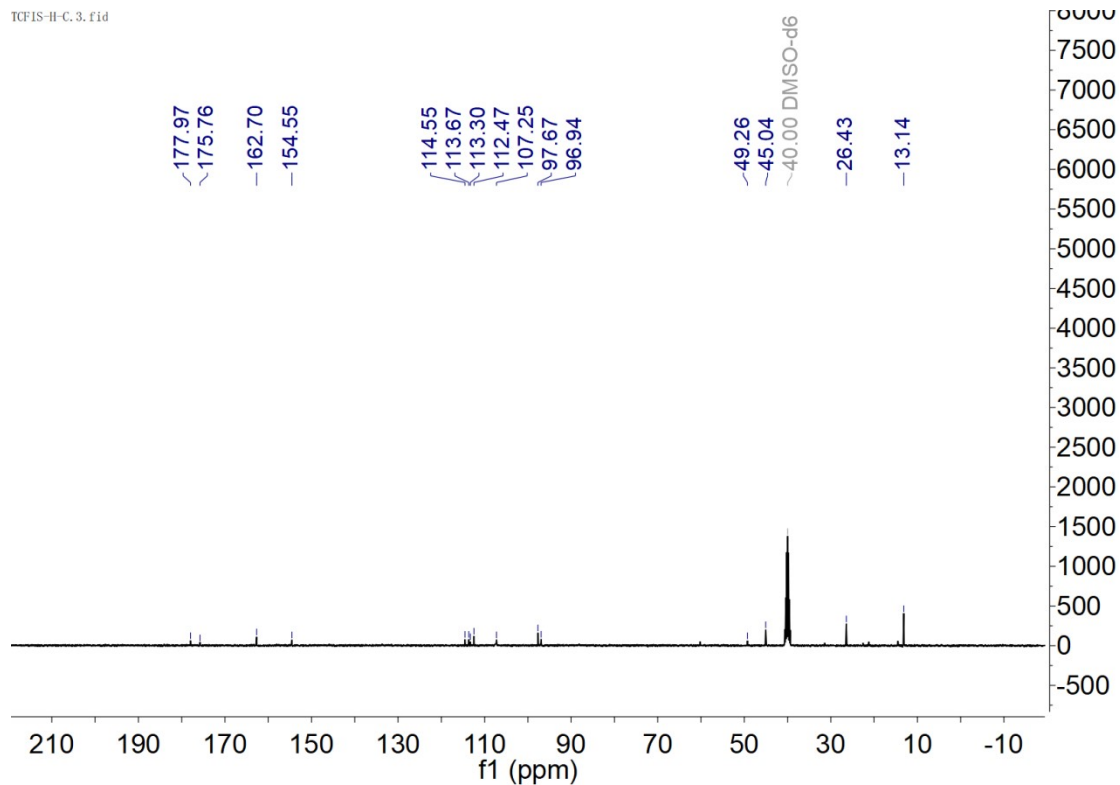

Figure S2.  $^{13}\text{C}$  NMR spectrum of TCFIS in  $d_6$ -DMSO.

TCFPB-H.2.fid

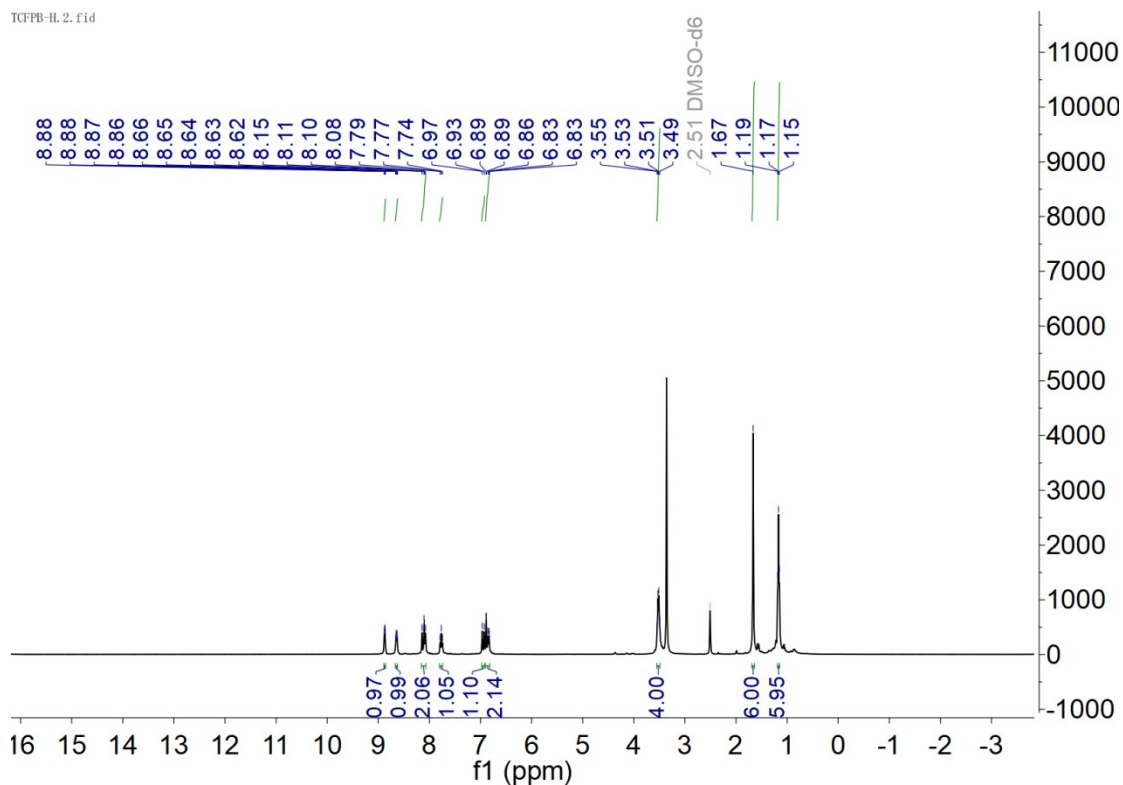

Figure S3.  $^1\text{H}$  NMR spectrum of TCFPB- $\text{H}_2\text{S}_n$  in  $d_6$ -DMSO.

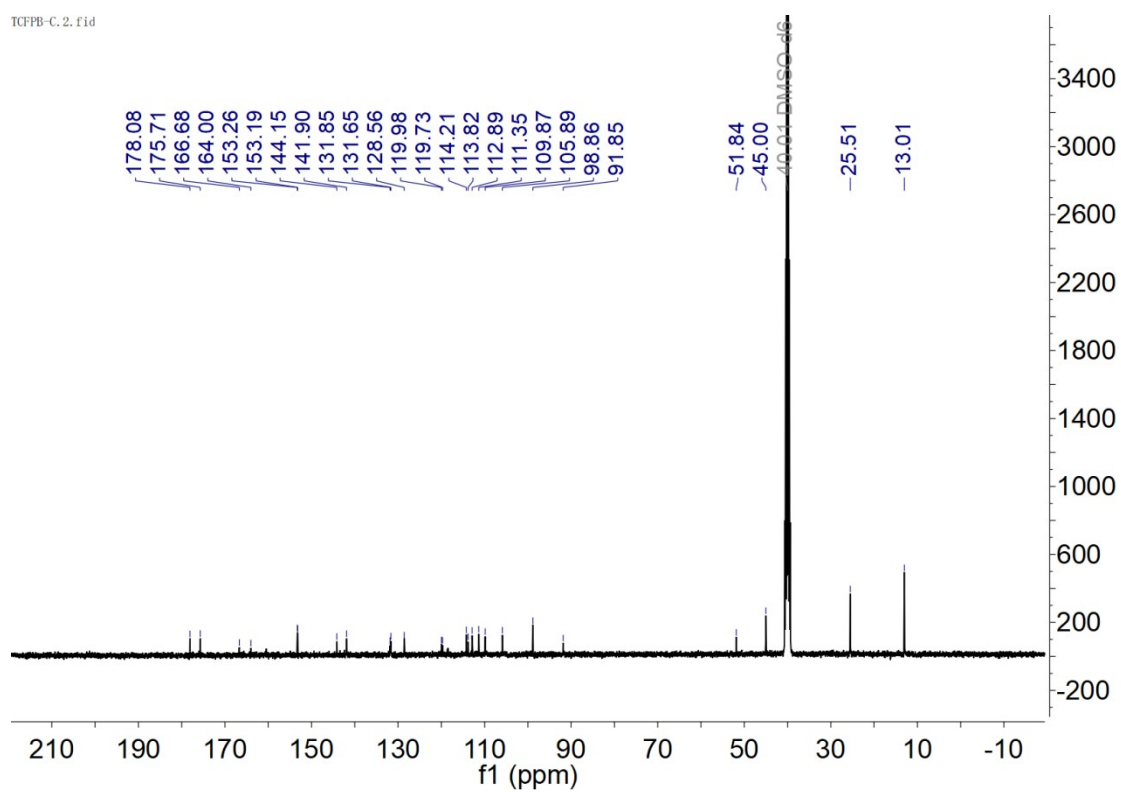

Figure S4.  $^{13}\text{C}$  NMR spectrum of TCFPB- $\text{H}_2\text{S}_n$  in  $d_6$ -DMSO.

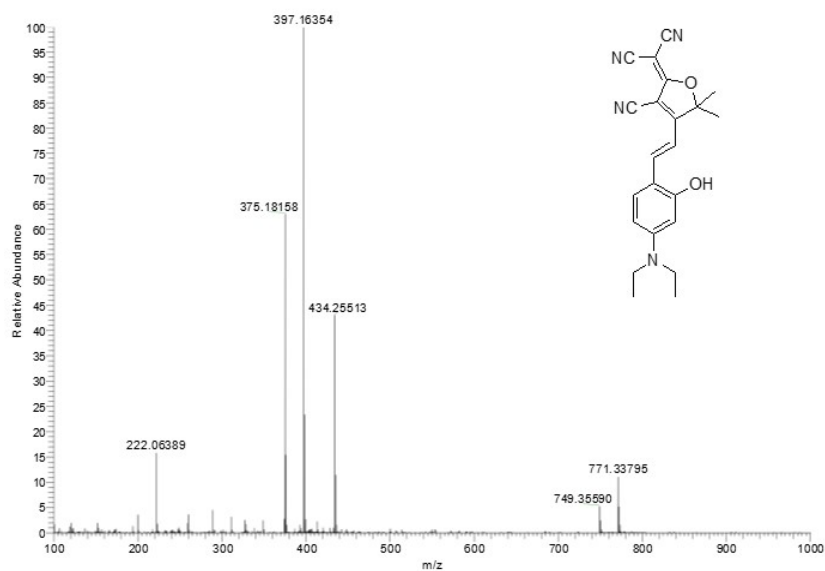

Figure S5. HRMS spectrum of TCFIS.

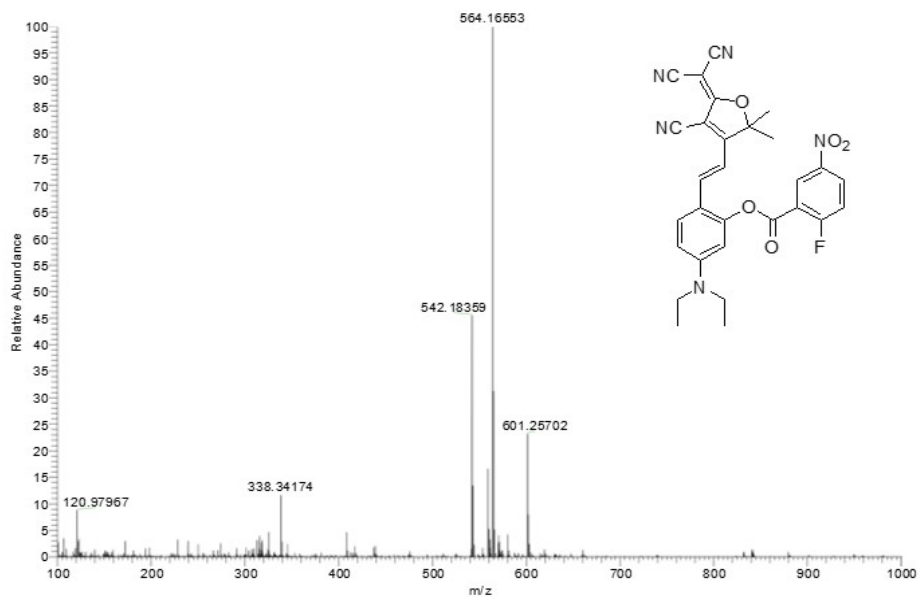

Figure S6. HRMS spectrum of TCFPB-H<sub>2</sub>S<sub>n</sub>.

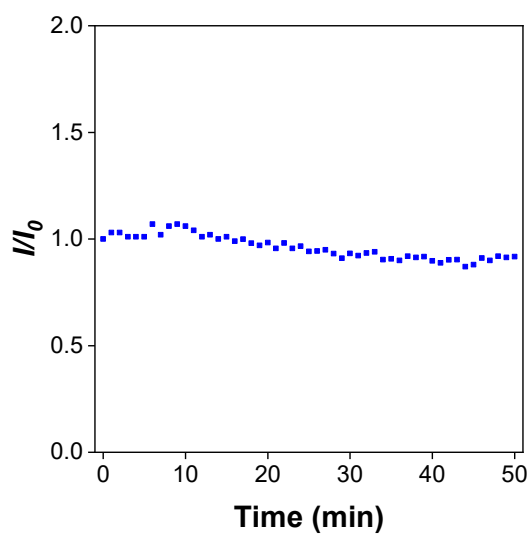

Figure S7. The light stability test of TCFPB-H<sub>2</sub>S<sub>n</sub> in 50 min, TCFPB-H<sub>2</sub>S<sub>n</sub> = 5 μM. λ<sub>ex</sub> = 575 nm.

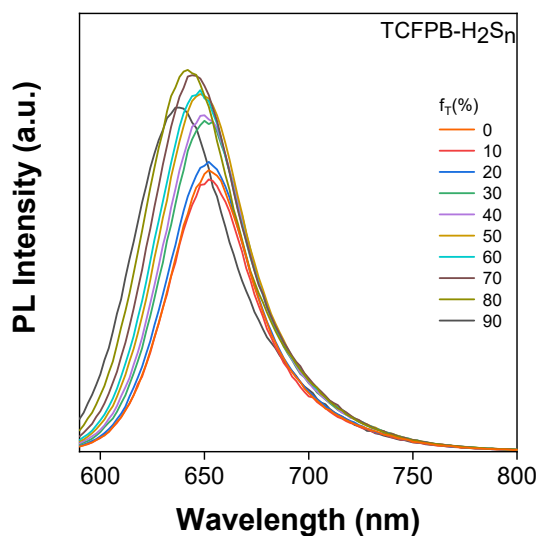

**Figure S8.** PL spectra of TCFPB-H<sub>2</sub>S<sub>n</sub> in toluene/DMSO mixtures with different toluene fractions.  $\lambda_{\text{ex}} = 575$  nm.

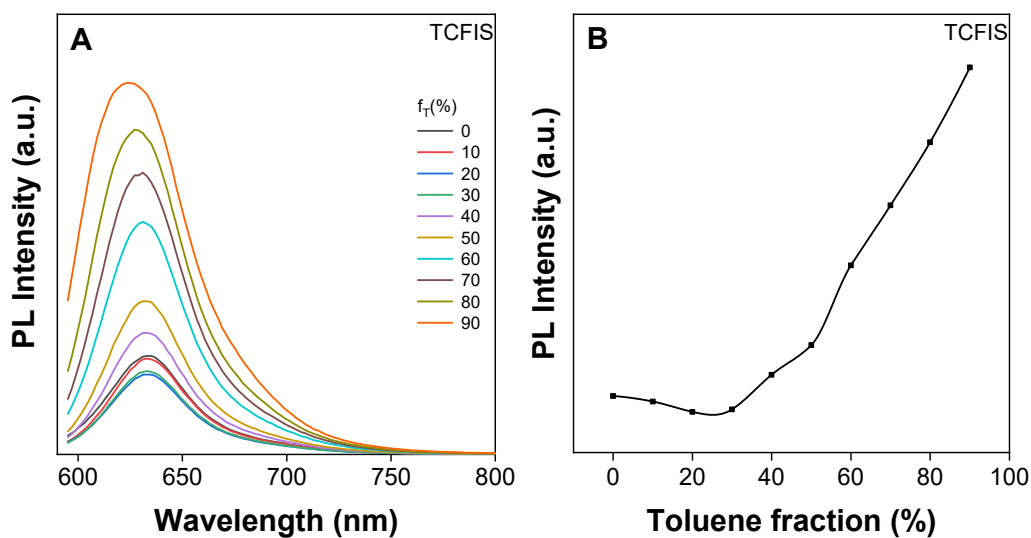

**Figure S9.** (A) PL spectra of TCFIS in toluene/DMSO mixtures with different toluene fractions. (B) The plot of PL intensity vs the composition of the DMSO/Toluene mixtures of TCFIS.  $\lambda_{\text{ex}} = 575$  nm.

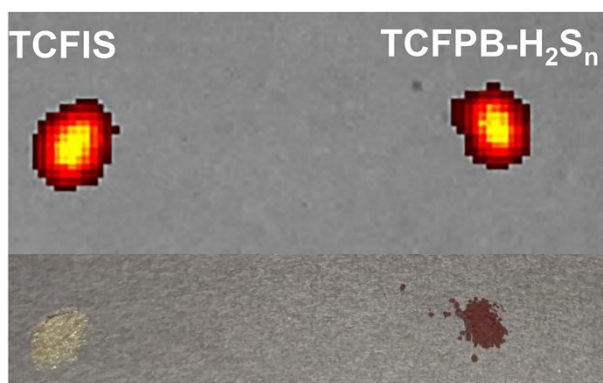

**Figure S10.** Fluorescence imaging for powder of TCFIS and TCFPB-H<sub>2</sub>S<sub>n</sub> under IVIS. Fluorescent emission was collected from 600 to 840 nm.  $\lambda_{\text{ex}} = 570$  nm.



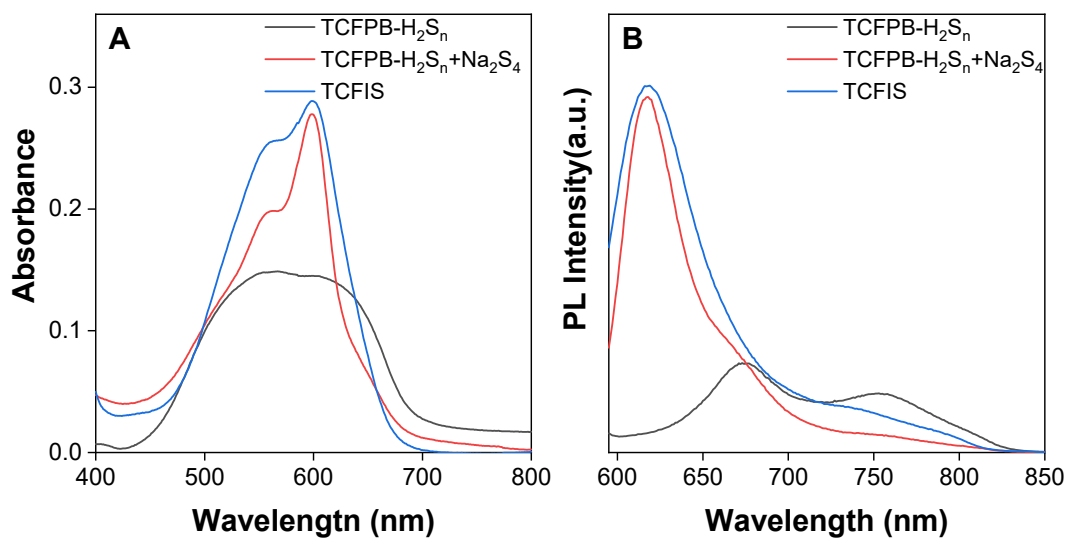

**Figure S11.** Normalized absorption and PL spectra of **TCFPB-H<sub>2</sub>S<sub>n</sub>** (5 μM, black), **TCFIS** (5 μM, blue) and **TCFPB-H<sub>2</sub>S<sub>n</sub>** (5 μM) after incubation with Na<sub>2</sub>S<sub>4</sub> (250 μM, red) at 37°C for 5 min in PBS solution. λ<sub>ex</sub> = 575 nm.

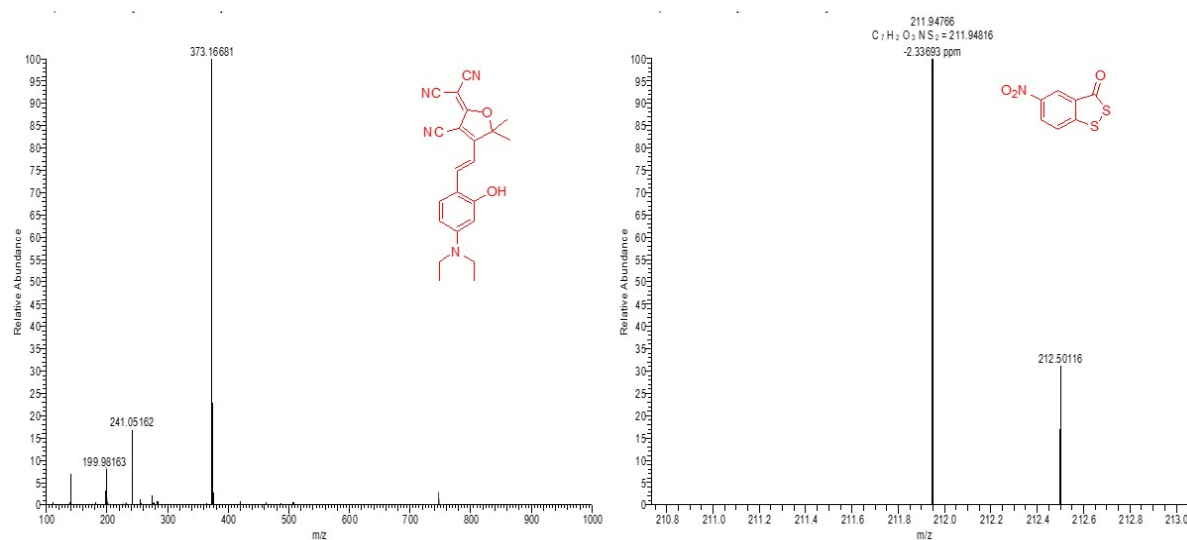

**Figure S12.** HRMS spectrum of **TCFPB-H<sub>2</sub>S<sub>n</sub>** after incubation with Na<sub>2</sub>S<sub>4</sub> (300 μM) at 37 °C for 30 min. **TCFIS** ([M-H]<sup>-</sup> calcd for C<sub>22</sub>H<sub>21</sub>N<sub>4</sub>O<sub>2</sub>: 373.16700, found: 373.16681). **Compound 3** ([M-H]<sup>-</sup> calcd for C<sub>7</sub>H<sub>2</sub>NO<sub>3</sub>S<sub>2</sub>: 211.94816, found: 211.94766).

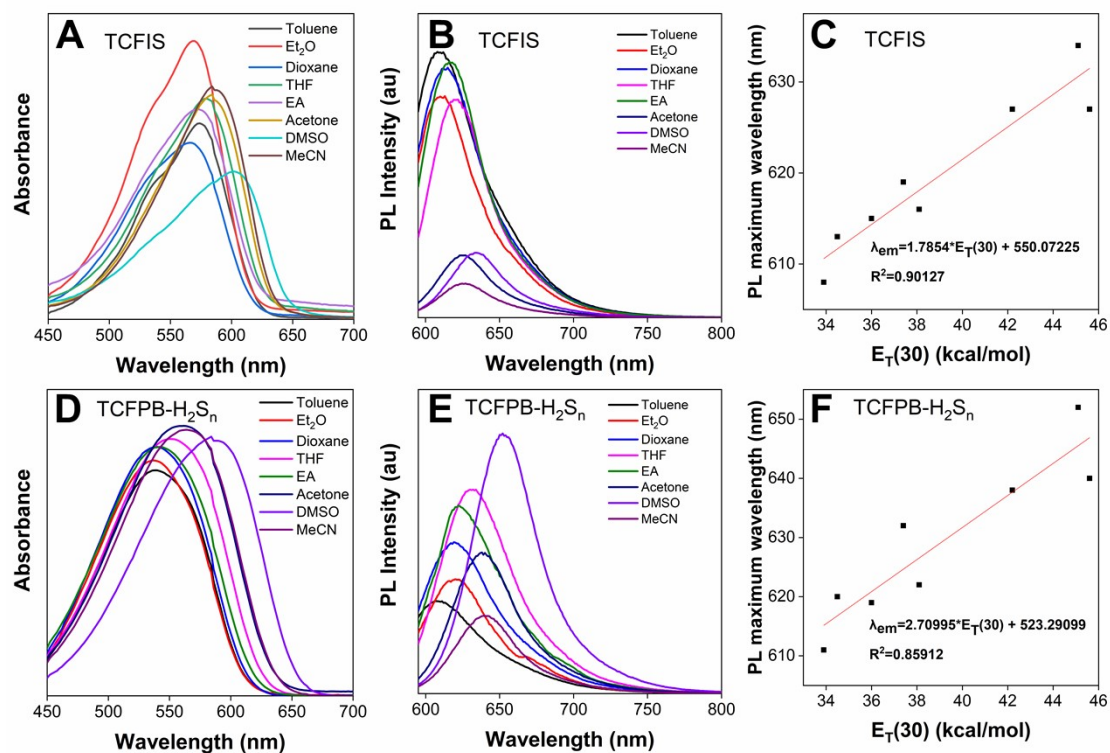

**Figure S13.** Absorption (A) and emission (B) spectra of **TCFIS** in different solvents. (C) Plot of the emission maximum of **TCFIS** in different solvents versus  $E_T(30)$ . Absorption (D) and emission (E) spectra of **TCFPB-H<sub>2</sub>S<sub>n</sub>** in different solvents. (F) Plot of the emission maximum of **TCFPB-H<sub>2</sub>S<sub>n</sub>** in different solvents versus  $E_T(30)$ .  $E_T(30)$  was the empirical parameter for solvent polarity.

Concentration: 5  $\mu$ M.  $\lambda_{ex} = 575$  nm.

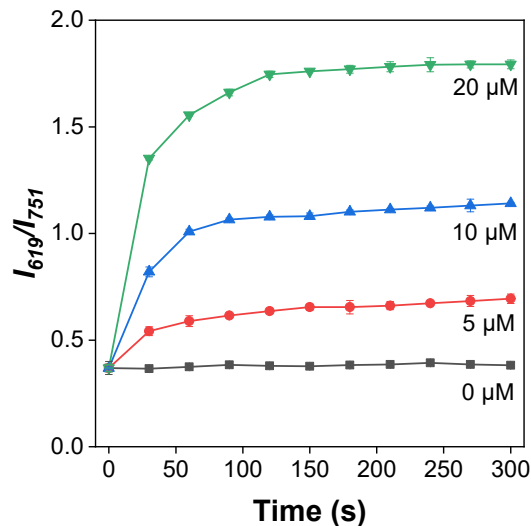

**Figure S14.** Time-dependent fluorescence intensity ratio ( $I_{619}/I_{751}$ ) of **TCFPB-H<sub>2</sub>S<sub>n</sub>** (5  $\mu$ M) with different concentrations (0, 5, 10 and 20  $\mu$ M) of Na<sub>2</sub>S<sub>4</sub>.  $\lambda_{ex} = 575$  nm.

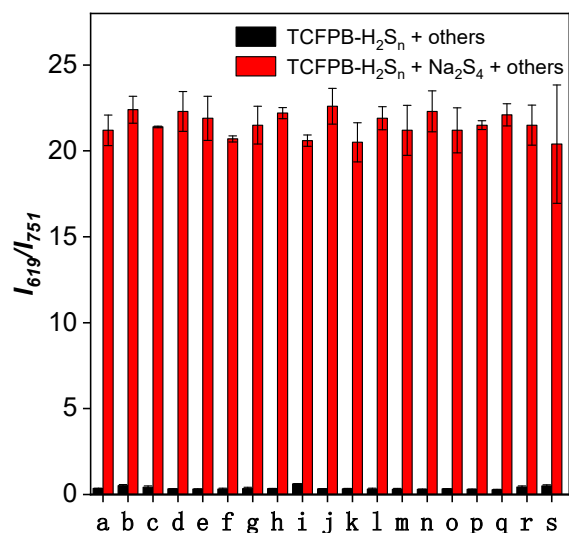

**Figure S15.** Fluorescence intensity ratio of  $I_{619}/I_{751}$  in the absence (black bar) or presence (red bar) of 250  $\mu\text{M}$   $\text{Na}_2\text{S}_4$  upon addition of 250  $\mu\text{M}$  other biologically-relevant species; a:  $\text{S}_2\text{O}_5^{2-}$ ; b:  $\text{ClO}^-$ ; c:  $\text{H}_2\text{O}_2$ ; d:  $\text{MnO}_4^-$ ; e:  $\text{Mg}^{2+}$ ; f:  $\text{K}^+$ ; g: Cys; h:  $\text{Fe}^{3+}$ ; i:  $\text{H}_2\text{S}$ ; j:  $\text{HSO}_3^-$ ; k:  $\text{SO}_4^{2-}$ ; l: Hcy; m: I<sup>-</sup>; n:  $\bullet\text{OH}$ ; o: ATP; p:  $\text{S}_2\text{O}_8^{2-}$ ; q: GSH (5 mM); r:  $\text{NO}_3^-$ ; s: GSSH. **TCFPB-H<sub>2</sub>S<sub>n</sub>** = 5  $\mu\text{M}$ ,  $\lambda_{\text{ex}}$  = 575 nm.

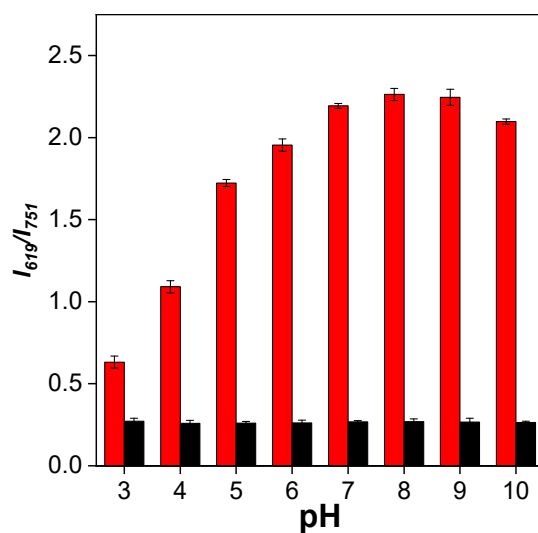

**Figure S16.** The PL intensity ratios ( $I_{619}/I_{751}$ ) of **TCFPB-H<sub>2</sub>S<sub>n</sub>** (5  $\mu\text{M}$ , black bars) and **TCFPB-H<sub>2</sub>S<sub>n</sub>** (5  $\mu\text{M}$ ) +  $\text{Na}_2\text{S}_4$  (50  $\mu\text{M}$ , red bars) in different pH buffers.  $\lambda_{\text{ex}}$  = 575 nm.

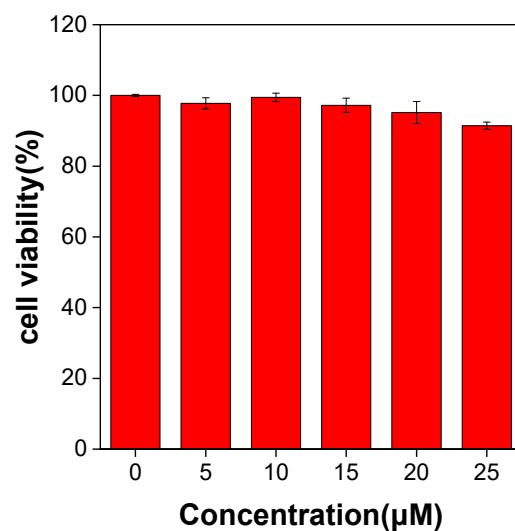

**Figure S17.** Cell viability of HeLa cells at varied concentrations of TCFPB- $\text{H}_2\text{S}_n$  by using CCK8 method.

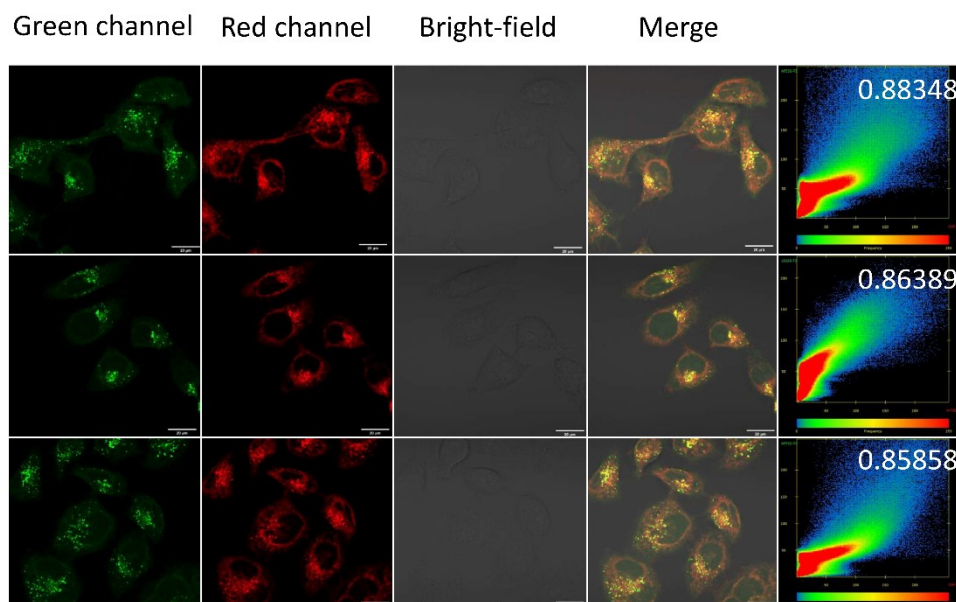

**Figure S18.** Colocation fluorescence image. HeLa cells were co-incubated with TCFIS ( $1 \mu\text{M}$ ) and Lyso-tracker ( $100 \text{ nM}$ ) for 20 min. Lyso-tracker: green channel; TCFIS: red channel; Green channel ( $500\text{--}590 \text{ nm}$ ),  $\lambda_{\text{ex}} = 488 \text{ nm}$ ; red channel ( $600\text{--}650 \text{ nm}$ ),  $\lambda_{\text{ex}} = 561 \text{ nm}$ . Scale bar  $20 \mu\text{m}$ .

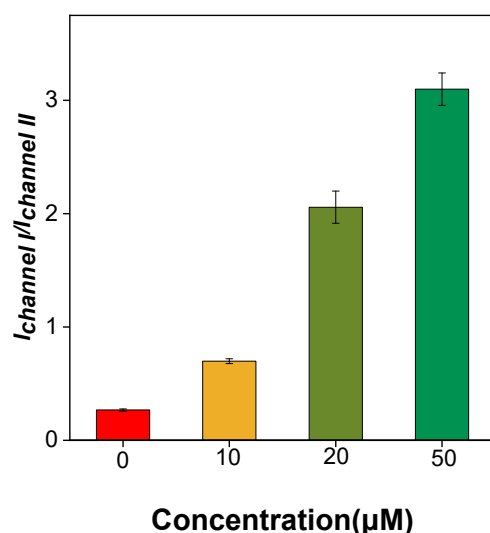

**Figure S19.** The PL intensity ratios ( $I_{\text{channel I}} / I_{\text{channel II}}$ ) of the channel I and channel II in Figure 5.  $\lambda_{\text{ex}} = 561 \text{ nm}$ . channel I: 600-650 nm; channel II: 730-770 nm.

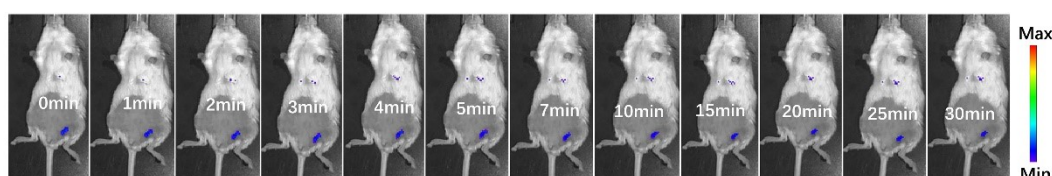

**Figure S20.** Time-dependent fluorescent images in live mice using probe **TCFPB- $\text{H}_2\text{S}_n$**  in the absence of exogenous  $\text{H}_2\text{S}_n$ ; **TCFPB- $\text{H}_2\text{S}_n$**  ( $5 \mu\text{M}$ ,  $100 \mu\text{L}$ ) was injected in a subcutaneous manner, followed by an injection of PBS ( $100 \mu\text{L}$ ). Fluorescent emission was collected from 600 to 650 nm.  $\lambda_{\text{ex}} = 570 \text{ nm}$ .

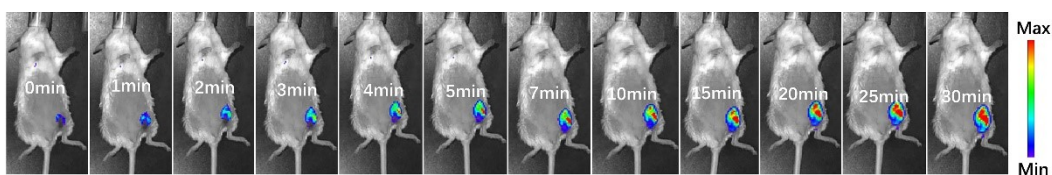

**Figure S21.** Time-dependent fluorescent images of  $\text{H}_2\text{S}_n$  in live mice using probe **TCFPB- $\text{H}_2\text{S}_n$**  in the presence of exogenous  $\text{H}_2\text{S}_n$ ; **TCFPB- $\text{H}_2\text{S}_n$**  ( $5 \mu\text{M}$ ,  $100 \mu\text{L}$ ) was injected, followed by an injection of  $\text{Na}_2\text{S}_4$  ( $1 \text{ mM}$ ,  $100 \mu\text{L}$ ). Fluorescent emission was collected from 600 to 650 nm.  $\lambda_{\text{ex}} = 570 \text{ nm}$ .

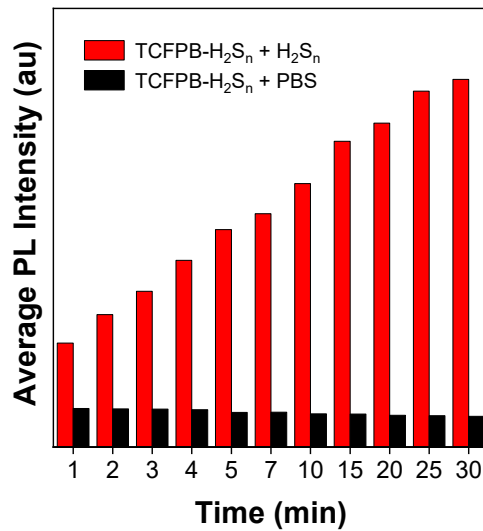

**Figure S22.** Time-dependent changes of average PL intensity in Figure S20 and S21.

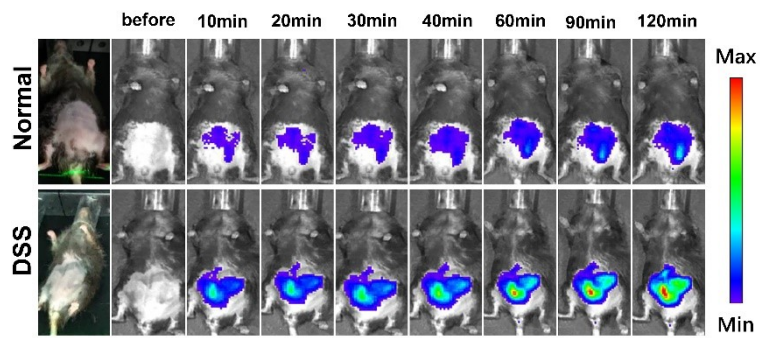

**Figure S23.** Time-dependent fluorescent images in live mice using probe **TCFPB-H<sub>2</sub>S<sub>n</sub>** in DSS and normal mice. **TCFPB-H<sub>2</sub>S<sub>n</sub>** (1  $\mu$ M, 100  $\mu$ L); Channel I: 600-650nm.  $\lambda_{ex}$  = 570 nm.

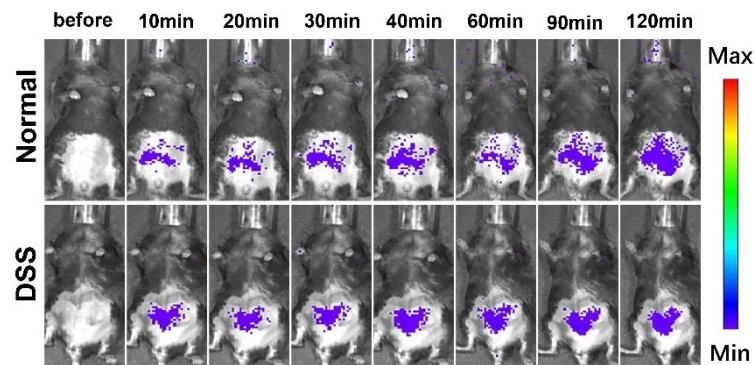

**Figure S24.** Time-dependent fluorescent images in live mice using probe **TCFPB-H<sub>2</sub>S<sub>n</sub>** in DSS and normal mice. **TCFPB-H<sub>2</sub>S<sub>n</sub>** (1  $\mu$ M, 100  $\mu$ L); Channel II: 730-770nm.  $\lambda_{ex}$  = 570 nm.

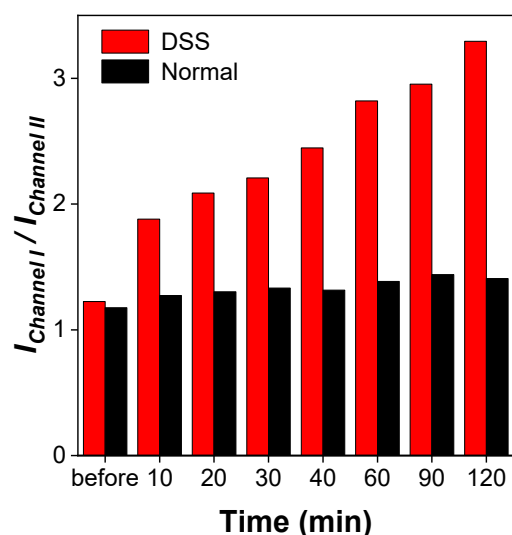

**Figure S25.** Time-dependent changes of average PL intensity ratios ( $I_{\text{Channel I}}/I_{\text{Channel II}}$ ) in Figure S23 and S24.

**Table S1.** Comparison of reported fluorescent probes for  $\text{H}_2\text{S}_n$  detection.

| References                                        | Response time | Response mode | Detection limit | $\lambda_{\text{ex}}/\lambda_{\text{em}}$ (nm) | Targeting | Diseases <i>in vivo</i> model |
|---------------------------------------------------|---------------|---------------|-----------------|------------------------------------------------|-----------|-------------------------------|
| Org. Lett. 2015, <b>17</b> , 2776-2779.           | 15 min        | Turn-on (ACQ) | 300 nM          | 350/530                                        | /         | /                             |
| Anal. Chem. 2015, <b>87</b> , 3004-3010.          | ND            | Turn-on (ACQ) | 500 nM          | 730(Two-photon)/536                            | /         | /                             |
| Analyst 2015, <b>140</b> , 3766-3772.             | 20 min        | Turn-on (ACQ) | 50 nM           | 707/737                                        | /         | /                             |
| Sensor Actuat B-Chem. 2016, <b>230</b> , 773-778. | 10 min        | Turn-on (ACQ) | 152 nM          | 450/512                                        | /         | /                             |
| RSC. Adv. 2016, <b>6</b> , 88519-88525.           | 40 min        | Turn-on (ACQ) | 75 nM           | 560/620                                        | /         | /                             |
| Chem. Commun. 2017, <b>53</b> , 8759-8762.        | 10 min        | Turn-on (ACQ) | 35 nM           | 680/708                                        | /         | /                             |
| J. Mater. Chem. B. 2017, <b>5</b> , 2574-2579.    | 5 min         | Turn-on (ACQ) | 22 nM           | 680/720                                        | /         | /                             |

|                                                   |         |                   |         |          |              |                             |
|---------------------------------------------------|---------|-------------------|---------|----------|--------------|-----------------------------|
| Anal. Chem. 2017, <b>89</b> , 12984-12991.        | 60 min  | Turn-on (ACQ)     | 40 nM   | 366/465  | /            | /                           |
| Chem. Commun. 2017, <b>53</b> , 1064-1067.        | 1 min   | Turn-on (ACQ)     | 420 nM  | 470/525  | /            | /                           |
| Talanta 2017, <b>164</b> , 529-533.               | 7 min   | Turn-on (ACQ)     | 18.2 nM | 400/490  | /            | /                           |
| Anal. Chem. 2019, <b>91</b> , 7774-7791.          | 5 min   | Turn-on (ACQ)     | 100 nM  | 500/635  | /            | Acute peritonitis and tumor |
| Anal. Chem. 2018, <b>90</b> , 881-887.            | 1 min   | Turn-on (ACQ)     | 50 nM   | 460/490  | /            | /                           |
| Sensor Actuat B-Chem. 2018, <b>254</b> , 222-226. | 6 min   | Turn-on (ACQ)     | 8.2 nM  | 535/682  | /            | /                           |
| Biomater Sci 2018, <b>6</b> , 672-682.            | 2 min   | Turn-on (ACQ)     | 10 nM   | 710/736  | /            | /                           |
| J. Am. Chem. Soc. 2014, <b>136</b> , 7257-7260.   | 5 min   | Turn-on (ACQ)     | 71 nM   | 490/515  | /            | /                           |
| Anal. Chem. 2015, <b>87</b> , 3631-3638.          | 0.5 min | Turn-on (ACQ)     | 25 nM   | 675/730  | Mitochondria | /                           |
| Anal. Chem. 2016, <b>88</b> , 4122-4129.          | 15 min  | Turn-on (ACQ)     | 80 nM   | 730/780  | Mitochondria | Acute liver injury          |
| ACS. Sens. 2018, <b>3</b> , 1622-1626.            | 50 min  | Turn-on (ACQ)     | 150 nM  | 460/520  | Mitochondria | /                           |
| Anal. Chem. 2016, <b>88</b> , 7206-7212.          | 5 min   | Ratiometric (ACQ) | 100 nM  | 370/ 460 | /            | /                           |
| Sensor Actuat B-Chem. 2019, <b>283</b> , 810-819  | 5 min   | Ratiometric (ACQ) | 100 nM  | 372/506  | Mitochondria | /                           |
| Chemical Science 2020, <b>11</b> , 7991-7999.     | <1 min  | Ratiometric (ACQ) | 9.4 nM  | 420/ 486 | /            | /                           |
| Dyes Pigm.,2020, <b>172</b> , 107818.             | 3min    | Ratiometric (ACQ) | 21 nM   | 420/ 468 | /            | /                           |



|                                                       |        |                   |       |          |              |                          |
|-------------------------------------------------------|--------|-------------------|-------|----------|--------------|--------------------------|
| ACS Applied Bio Materials 2019, <b>2</b> , 1987-1997. | 10 min | Ratiometric (ACQ) | 10 nM | 405/ 546 | Mitochondria | /                        |
| Dyes Pigm., 2021, <b>188</b> ,109190.                 | 10 min | Ratiometric (ACQ) | 20 nM | 405/ 550 | Mitochondria | /                        |
| Anal. Chim. Acta. 2019, <b>1056</b> , 117-124.        | 6 min  | Turn-on (ACQ)     | 84 nM | 340/520  | Lysosome     | /                        |
| Biomater Sci 2020, <b>8</b> , 224-231.                | 1 min  | Turn-on (ACQ)     | 1 nM  | 300/478  | Lysosome     | /                        |
| Dyes Pigm., 2020, <b>173</b> ,107877.                 | 5 min  | Ratiometric (ACQ) | 10 nM | 405/ 548 | Lysosome     | /                        |
| <b>This work</b>                                      | 2 min  | Ratiometric(AIE)  | 43 nM | 575/ 619 | Lysosome     | Acute ulcerative colitis |

#### References:

- 1 Julian Tirado-Rives and William L. Jorgensen, Performance of B3LYP Density Functional Methods for a Large Set of Organic Molecules, *J. Chem. Theory Comput.* 2008, **4**, 297–306.
- 2 Tariq Mahmood, Naveen Kosar, Khurshid Ayub, DFT study of acceleration of electrocyclization in photochromes under radical cationic conditions: Comparison with recent experimental data, *Tetrahedron.*2017, **73**, 3521–3528.
